# Supplementary material for: Matrix isolation FTIR and theoretical study of α-pyrone photochemistry
Source: Royal Society of Chemistry journal article supplement (doi:10.1039/b309660b), 2004-01-01
Supplement: figure_s1.doc [file figure_s1.doc]

Figure S1.

Calculated [B3LYP/6-311++G(d,p)] and experimental (non-irradiated Xe matrix; *T* = 25 K) infrared spectra of α-pyrone. Calculated frequencies scaled by 0.978. Note ordinate scale change at 1500 cm-1.
