# Supplementary material for: Matrix isolation FTIR and theoretical study of α-pyrone photochemistry
Source: Royal Society of Chemistry journal article supplement (doi:10.1039/b309660b), 2004-01-01
Supplement: table_s08.doc [file table_s08.doc]

## Table S8

Calculated vibrational frequencies, intensities and potential energy distributions (PED) for Ketene IV monomer (frequencies (**) in cm-1, intensities (*I*) in km mol-1).

| Symmetry | Calculated (B3LYP/6-311++G(d, p)) | | PEDb (%) |
| --- | --- | --- | --- |
|  | **a | I |  |
| A’ | 3071.3 | 7.0 | (C5-H11)(95.2) |
| A’ | 3066.9 | 6.9 | (C3-H9)(96.1) |
| A’ | 3037.3 | 5.3 | (C4-H10)(97.4) |
| A’ | 2773.2 | 109.0 | (C2-H8)(100.0) |
| A’ | 2165.2 | 1372.9 | (C6=O7)(74.2) + (C5=C6)(25.5) |
| A’ | 1706.3 | 525.5 | (O1=C2)(88.1) |
| A’ | 1619.3 | 400.6 | (C3=C4)(58.5) + (C6=O7)(14.8) |
| A’ | 1409.3 | 8.5 | (C2-H8)’’(39.8) + (C5-H11)’’(12.5) + (C5=C6)(9.9) |
| A’ | 1358.6 | 0.4 | (C2-H8)’’(46.6) + (C5-H11)’’(14.5) + (C5=C6)(13.2) |
| A’ | 1296.9 | 3.1 | (C4-H10)’’(55.4) + (C3=C4)(17.9) |
| A’ | 1220.9 | 8.7 | (C3-H9)’’(54.3) + (C4-H10)’’(17.7) |
| A’ | 1144.0 | 149.0 | (C5-H11)’’(33.1) + (C4-C5)(27.9) + (C3-H9)’’(13.7) |
| A’ | 1120.8 | 134.4 | (C2-C3)(40.5) + (C5-H11)’’(29.0) |
| A’ | 1055.2 | 1.2 | (C5=C6)(31.1) + (C4-C5)(20.5) + (C2-C3)(18.3) |
| A’’ | 1001.5 | 8.9 | (C2-H8)(75.4) + (C4-H10)(24.5) |
| A’’ | 963.1 | 43.7 | (C3-H9)(45.3) + (C4-H10)(43.9) + (C2-H8)(17.8) |
| A’’ | 835.3 | 8.9 | (C3-H9)(56.5) + (C4-H10)(36.8) |
| A’ | 668.2 | 20.0 | (C6=O7)(37.9) + (C5-H11)’(24.1) + (C2-H8)’(13.2) |
| A’’ | 636.1 | 31.4 | (C5-H11)(97.0) |
| A’ | 526.3 | 13.6 | (C2-H8)’(49.9) + (C6=O7)(19.9) + (C4-H10)’(15.6) |
| A’’ | 524.4 | 3.9 | (C5=C6)(95.6) |
| A’ | 399.5 | 1.4 | (C3-H9)’(30.3) + (C4-H10)’(27.2) + (C4-C5)(13.6) + (C2-C3) (13.5) |
| A’’ | 303.9 | 12.9 | (C3=C4)(61.9) + (C2-C3)(36.8) |
| A’ | 246.1 | 1.5 | (C3-H9)’(24.3) + (C5-H11)’(24.0) + (C6=O7)(19.4) + (C2-H8)’ (14.8) + (C4-H10)’(13.3) |
| A’’ | 182.5 | 0.05 | (C4-C5)(45.2) + (C2-C3)(31.9) + (C3=C4)(26.0) |
| A’ | 102.8 | 8.7 | (C5-H11)’(40.1) + (C4-H10)’(24.4) + (C3-H9)’(19.8) + (C6=O7) (12.5) |
| A’’ | 82.6 | 5.7 | (C4-C5)(52.1) + (C2-C3)(34.7) + (C3=C4)(12.0) |

a Theoretical positions of absorption bands were scaled for DFT calculations by a factor of 0.978, except for CH stretching modes which were multiplied by 0.968.

b PED’s lower than 10% are not included. Definition of symmetry coordinates is given in Table S3 (in the ESI). See Figure 1 for atom numbering.
