# Supplementary material for: Matrix isolation FTIR and theoretical study of α-pyrone photochemistry
Source: Royal Society of Chemistry journal article supplement (doi:10.1039/b309660b), 2004-01-01
Supplement: table_s13.doc [file table_s13.doc]

## Table S13

Observed and calculated vibrational frequencies, intensities and potential energy distributions (PED) cyclobutadiene monomer (frequencies (**) in cm-1, intensities (*I*) in km mol-1).

| Symmetry | Observed (infrared, Xe matrix, T = 25 K) | | Calculated (B3LYP/6-311++G(d, p)) | | PEDc (%) |
| --- | --- | --- | --- | --- | --- |
|  | ** | Ia | **b | I |  |
| Ag |  |  | 3136.3 | 0 | (C-H)s (98.1) |
| B1u |  |  | 3126.5 | 18.6 | (C-H)as’’ (98.4) |
| B2u |  |  | 3105.7 | 10.7 | (C-H)as’ (99.9) |
| B3g |  |  | 3090.7 | 0 | (C-H)as (100.2) |
| B1u | 1577.3 | 19.6 | 1589.3 | 8.3 | (C=C)as (84.2) + (C-H)as’ (14.2) |
| Ag |  |  | 1582.9 | 0 | (C=C)s (94.6) |
| B2u | 1239.4 | 40.4 | 1228.5 | 39.8 | (C-H)as (88.9) + (C-C)as (11.1) |
| B3g |  |  | 1156.8 | 0 | (C-H)s (98.2) |
| Ag |  |  | 1083.0 | 0 | (C-H)as’’ (55.8) + (C-C)s (40.8) |
| B1g |  |  | 1032.0 | 0.5 | (C-H)as’ (85.7) + (C=C)as (14.3) |
| Ag |  |  | 931.3 | 0 | (C-C)s (58.5) + (C-H)as’’ (40.3) |
| B1g |  |  | 870.7 | 0 | (C-H)as’ (100.2) |
| Au |  |  | 867.1 | 0 | (C-H)as’’ (107.9) |
| B3g |  |  | 833.8 | 0 |  ring (98.4) |
| B2u | 659.0  657.0  655.0 | 33.1  8.3  15.2 | 686.7 | 9.7 | (C-C)as (88.8) + (C-H)as (11.1) |
| B2g |  |  | 587.4 | 0 | (C-H)as (100.2) |
| B3u | 573.8 | 93.9 | 574.7 | 152.7 | (C-H)s (100.2) |
| Au |  |  | 523.5 | 0 |  ring (107.7) |

a Relative integrated intensities.

b Theoretical positions of absorption bands were scaled for DFT calculations by a factor of 0.978, except for CH stretching modes which were multiplied by 0.968.

c PED’s lower than 10% are not included. Definition of symmetry coordinates is given in Table S12 (in the ESI). See Figure 1 for atom numbering.
