# Supplementary material for: Matrix isolation FTIR and theoretical study of α-pyrone photochemistry
Source: Royal Society of Chemistry journal article supplement (doi:10.1039/b309660b), 2004-01-01
Supplement: table_s14.doc [file table_s14.doc]

# Table S14

Internal coordinates used in the normal modes analysis for FCB.

(Atom numbering as in Figure 1)

| S1 = r1,2 | (C1-C2) |
| --- | --- |
| S2 = r2,3 | (C2=C3) |
| S3 = r3,4 | (C3-C4) |
| S4 = r4,1 | (C4-C1) |
| S5 = r1,5 | (C1=O5) |
| S6 = (2-1/2)(r2,6 + r3,7) | (CH)s |
| S7 = (2-1/2)(r2,6 - r3,7) | (CH)as |
| S8 = r4,8 | (C4-H8) |
| S9 = r4,9 | (C4-C9) |
| S10 = r9,10 | (C9=O10) |
| S11 = r9,11 | (C9-H11) |
| S12 = (1/2) (1,3,2 - 2,4,3 + 3,1,4 - 4,2,1) |  ring |
| S13 = (2-1/2)(5,2,1 - 5,4,1) | (C1=O5) |
| S14 = (1/2)(6,1,2 - 6,3,2 + 7,2,3 - 7,4,3) | (CH)s |
| S15 = (1/2)(6,1,2 - 6,3,2 - 7,2,3 + 7,4,3) | (CH)as |
| S16 = (2-1/2)(8,1,4 - 8,3,4) | (C4-H8) |
| S17 = (2-1/2)(9,1,4 - 9,3,4) | (C4-C9) |
| S18 = (2-1/2)(11,4,9 - 11,10,9) | (C9-H11) |
| S19 = 10,4,9 | (C9=O10) |
| S20 = (1/2)(4,1,2,3 -1,2,3,4 +2,3,4,1 -3,4,1,2) |  ring |
| S21 = 5,4,1,2 | (C1=O5) |
| S22 = (2-1/2)(6,1,2,3 + 7,2,3,4) | (CH)s |
| S23 = (2-1/2)(6,1,2,3 - 7,2,3,4) | (CH)as |
| S24 = 8,1,4,3 | (C4-H8) |
| S25 = 9,1,4,3 | (C4-C9) |
| S26 = (2-1/2)(10,9,4,1 + 10,9,4,3) | (C9=O10) |
| S27 = (2-1/2)(11,9,4,1 + 11,9,4,3) | (C9-H11) |

ri,j is the distance between atoms Ai and Aj; i,j,k is the angle between vectors AkAi and AkAj; i,j,k,l is the dihedral angle between the plane defined by Ai, Aj, Ak and the plane defined by Aj, Ak, Al atoms;i,j,k,l is the angle between the vector AkAi and the plane defined by atoms Aj, Ak, Al.
