# Supplementary figures and images for: Matrix isolation FTIR and theoretical study of α-pyrone photochemistry
Source: Royal Society of Chemistry journal article supplement (doi:10.1039/b309660b), 2004-01-01

Figure S3


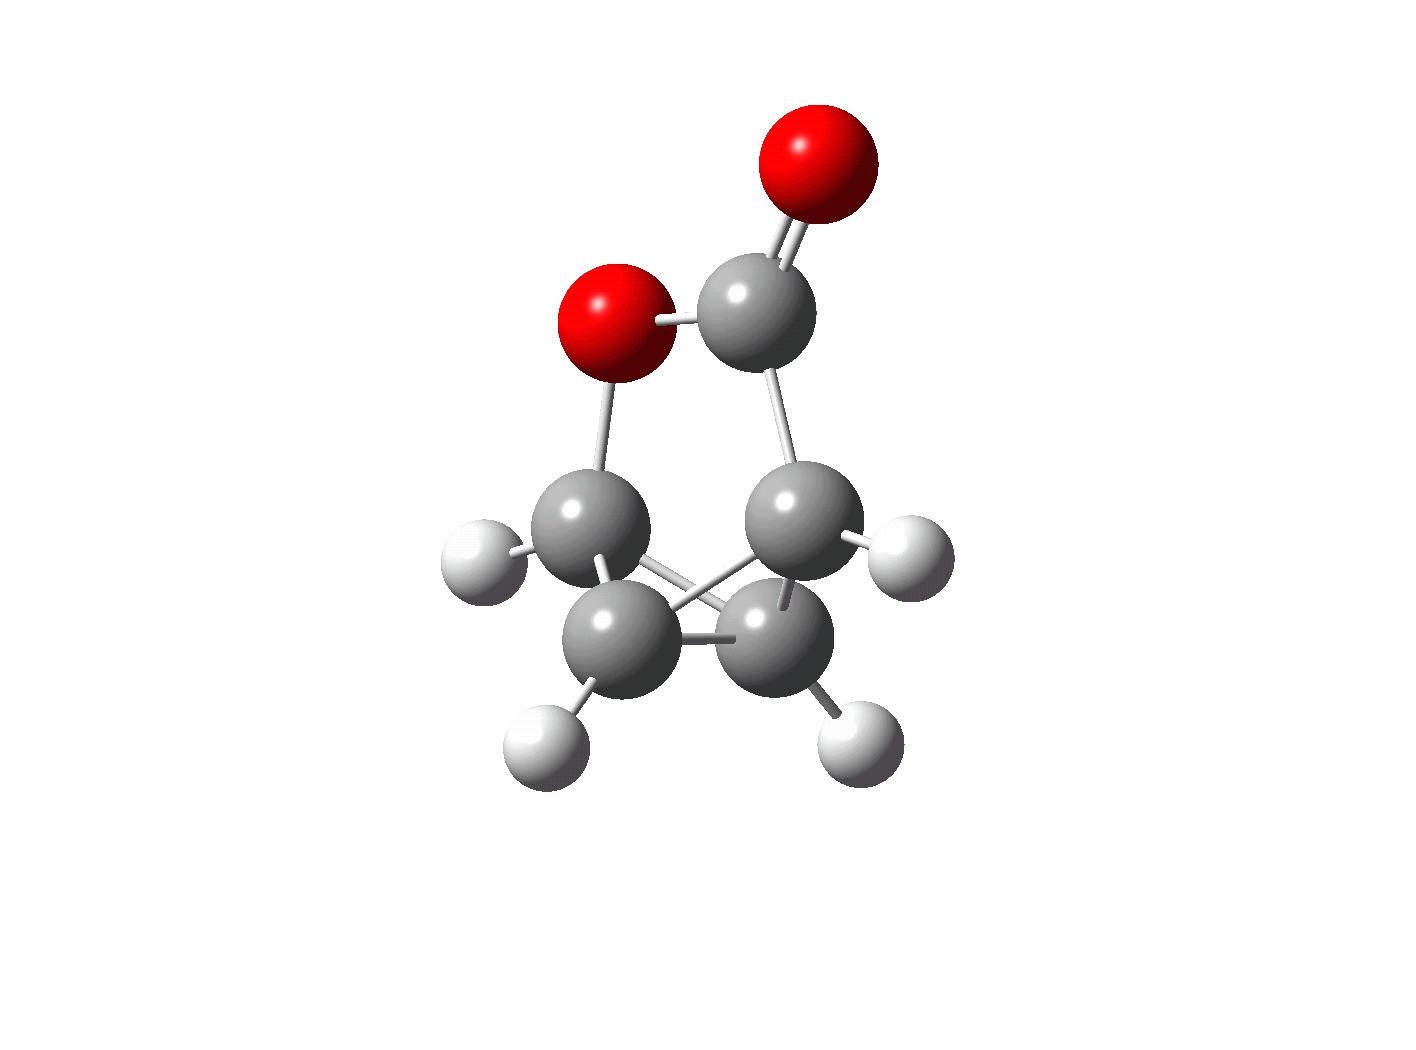

Supplement: figure_s3.doc [file figure_s3.doc]
